# Supplementary material for: Impact of Powder Properties on the Rheological Behavior of Excipients
Source: MDPI journal article supplement (doi:10.3390/pharmaceutics13081198), 2021-08-04
Supplement: s1 [file s1]

# Supplementary Materials: Impact of Powder Properties on the Rheological Behavior of Excipients

Pauline H. M. Janssen <sup>1,\*</sup>, Sébastien Depaifve <sup>2</sup>, Aurélien Neveu <sup>2</sup>, Filip Francqui <sup>2</sup>, and Bastiaan H. J. Dickhoff <sup>1</sup>

**Supplementary Figure S1.** Scanning electron micrographs of the excipients used in this study: a) Lactopress® anhydrous, b) SuperTab® 21AN, c) SuperTab® 22AN, d) SuperTab® 24AN, e) Pharmatose® 80M, f) Pharmatose® 150M, g) Pharmatose® 200M, h) Pharmatose® 450M, i) SuperTab® 30GR, j) SuperTab® 11SD, k) SuperTab® 14SD, l) SuperTab® 50ODT, m) Pharmacel® 101, n) Pharmacel® 102, o) Pharmacel® sMCC90, p) Primojel®, q) Primellose®. The scale bars represent 100  $\mu\text{m}$ .

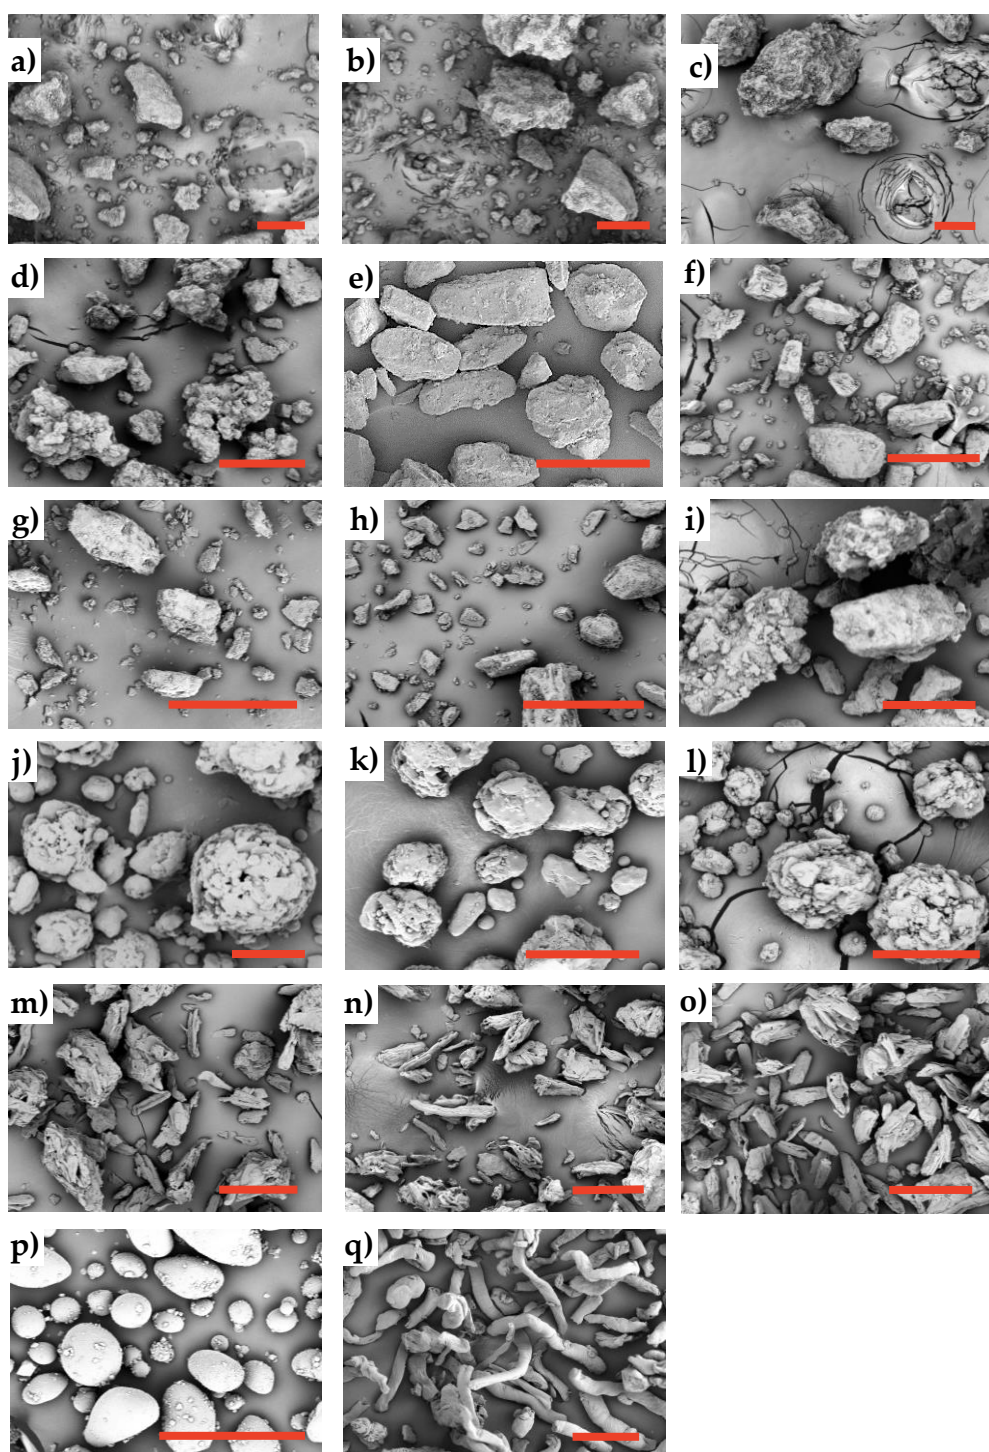

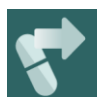

**Supplementary Table S1:** Physical properties for the set of excipients that is used in this study, being total moisture content by Karl-Fisher titration (KF), free moisture content by Loss On Drying (LOD), specific surface area (SSA), tapped density (TD), initial charge density ( $q_i$ ), final charge density ( $q_f$ ), tribo-charging density variation ( $\Delta q$ ), true density (TrD), yield pressure at 0.01 mm/s (PyS), yield pressure at 300 mm/s (PyF) and strain rate sensitivity (SRS) .

| Grade                 | KF<br>(%w/w) | LOD<br>(%w/w) | SSA<br>(g/m <sup>2</sup> ) | TD<br>(g/mL) | q <sub>0</sub><br>(nC/g) | q <sub>f</sub><br>(nC/g) | $\Delta q$<br>(nC/g) | TrD<br>(g/mL) | PyS<br>(MPa) | PyF<br>(MPa) | SRS<br>(%) |
|-----------------------|--------------|---------------|----------------------------|--------------|--------------------------|--------------------------|----------------------|---------------|--------------|--------------|------------|
| Lactopress® anhydrous | 0.1          | 0.1           | 0.3                        | 0.89         | -0.6                     | -3.6                     | -3.0                 | 1.57          | 236          | 229          | 3          |
| SuperTab® 21AN        | 0.3          | 0.0           | 0.4                        | 0.92         | -0.2                     | -2.6                     | -2.3                 | 1.58          | 208          | 194          | 7          |
| SuperTab® 22AN        | 0.2          | 0.1           | 0.4                        | 0.80         | -0.2                     | -2.6                     | -2.3                 | 1.58          | 208          | 194          | 7          |
| SuperTab® 24AN        | 0.8          | 0.1           | 0.5                        | 0.68         | 0.0                      | -3.8                     | -3.8                 | 1.54          | 166          | 155          | 7          |
| Pharmatose® 80M       | 5.0          | 0.3           | 0.1                        | 0.94         | -0.3                     | -0.5                     | -0.2                 | 1.54          | 171          | 172          | -1         |
| Pharmatose® 150M      | 4.7          | 0.3           | 0.4                        | 0.98         | -0.1                     | -0.1                     | 0.0                  | 1.53          | 185          | 175          | 6          |
| Pharmatose® 200M      | 4.9          | 0.4           | 0.8                        | 0.97         | -1.5                     | -4.0                     | -2.5                 | 1.54          | 189          | 186          | 2          |
| Pharmatose® 450M      | 5.0          | 0.4           | 1.3                        | 0.79         | -1.2                     | -3.6                     | -2.4                 | 1.54          | 194          | 173          | 12         |
| SuperTab® 30GR        | 4.8          | 0.3           | 0.4                        | 0.78         | -0.4                     | -4.1                     | -3.7                 | 1.53          | 192          | 175          | 10         |
| SuperTab® 11SD        | 5.1          | 0.3           | 0.1                        | 0.75         | -0.1                     | -3.9                     | -3.7                 | 1.54          | 170          | 154          | 11         |
| SuperTab® 14SD        | 4.8          | 0.4           | 0.2                        | 0.72         | -0.8                     | -1.4                     | -0.6                 | 1.53          | 184          | 165          | 11         |
| SuperTab® 50ODT       | 4.7          | 0.1           | 0.2                        | 0.83         | -0.4                     | -3.3                     | -2.8                 | 1.54          | 161          | 149          | 8          |
| Pharmacel® 101        | 4.5          | 4.5           | 1.4                        | 0.50         | -0.5                     | -2.6                     | -2.1                 | 1.54          | 81           | 79           | 2          |
| Pharmacel® 102        | 4.2          | 4.2           | 1.2                        | 0.49         | -0.4                     | -3.5                     | -3.2                 | 1.55          | 80           | 78           | 3          |
| Pharmacel® sMCC90     | 4.5          | 4.5           | 5.1                        | 0.50         | -0.1                     | -2.1                     | -2.1                 | 1.56          | 100          | 85           | 17         |
| Primojel®             | 9.3          | 4.8           | 0.2                        | 0.96         | -0.3                     | -5.1                     | -4.8                 | 1.52          | 145          | 98           | 48         |
| Primellose®           | 9.3          | 5.3           | 0.3                        | 0.74         | 0.2                      | -4.5                     | -4.7                 | 1.53          | 158          | 121          | 31         |



**Supplementary Table S2:** Particle size distribution of the blends of different amounts of fines (Pharmatose® 450M) and coarse lactose (Pharmatose® 80M).

| Amount of fines | x10 (µm) | x50 (µm) | x90 (µm) | Span |
|-----------------|----------|----------|----------|------|
| 0%fines         | 49       | 238      | 374      | 1.37 |
| 5%fines         | 29       | 231      | 370      | 1.48 |
| 10%fines        | 20       | 223      | 365      | 1.55 |
| 15%fines        | 15       | 214      | 363      | 1.63 |
| 20%fines        | 12       | 202      | 360      | 1.72 |
| 25%fines        | 10       | 189      | 357      | 1.83 |
| 30%fines        | 8.7      | 173      | 353      | 1.99 |
| 35%fines        | 7.6      | 150      | 349      | 2.27 |
| 40%fines        | 6.7      | 109      | 344      | 3.09 |
| 60%fines        | 4.7      | 38       | 311      | 8.07 |
| 80%fines        | 3.7      | 27       | 238      | 8.84 |
| 100%fines       | 3.1      | 21       | 52       | 2.37 |
